# Supplementary material for: The Third Intron of the Interferon Regulatory Factor-8 Is an Initiator of Repressed Chromatin Restricting Its Expression in Non-Immune Cells
Source: PLOS journal article supplement (doi:10.1371/journal.pone.0156812), 2016-06-03
Supplement: S5 (10.1371/journal.pone.0156812.s005) [file journal.pone.0156812.s005]

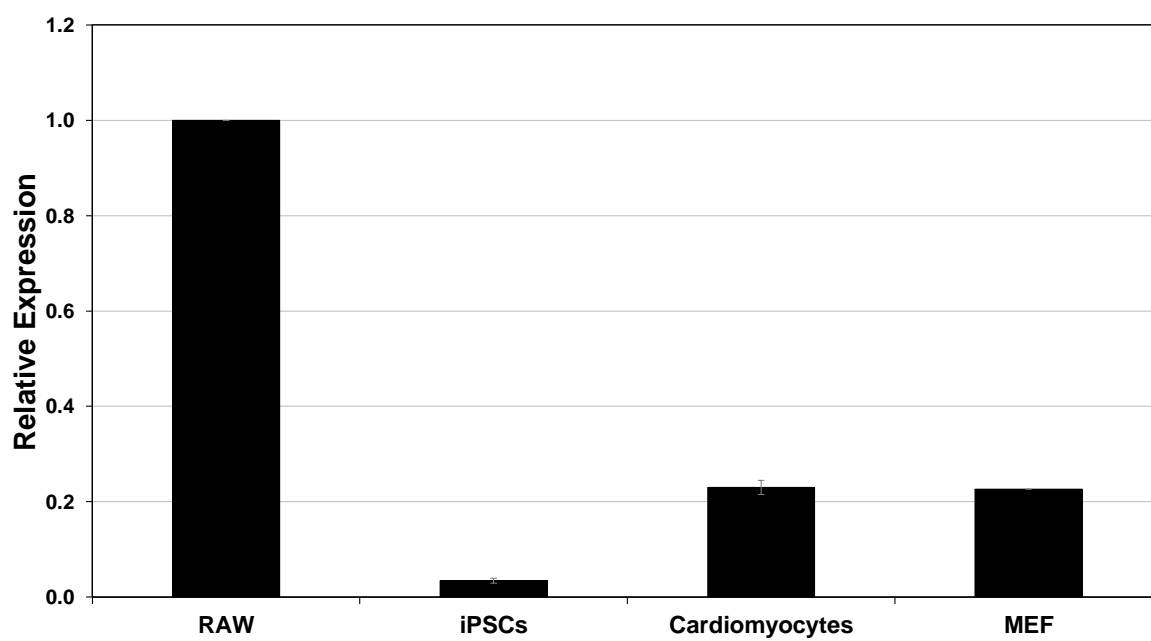

**S5 Fig. IRF-8 mRNA expression in undifferentiated and differentiated miPSCs and MEF cells.**
